# Supplementary material
Source: PubMed Central journal article supplement (PMC6161666)

# Supplemental Figure 1

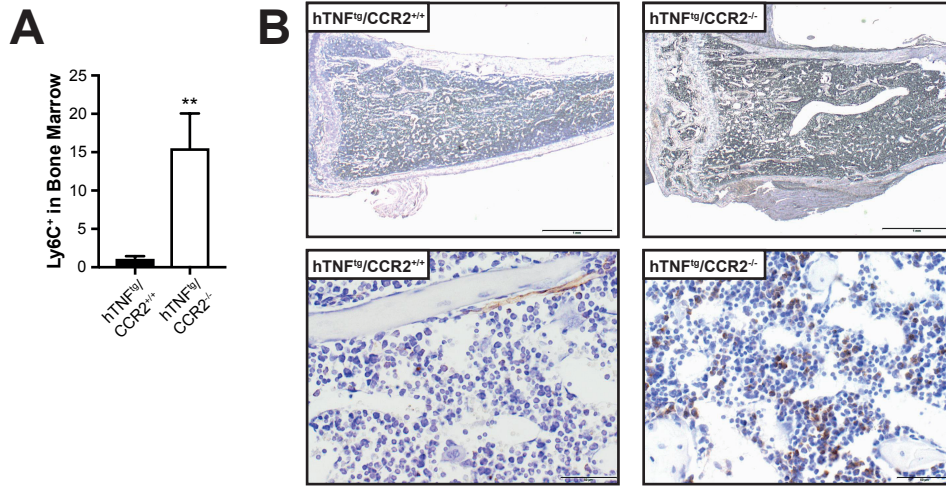

# Supplemental Figure 2

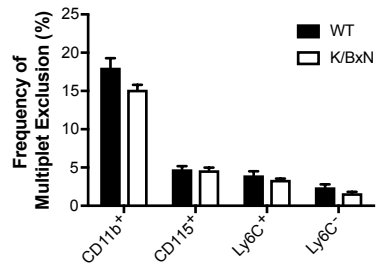

# Supplemental Figure 3

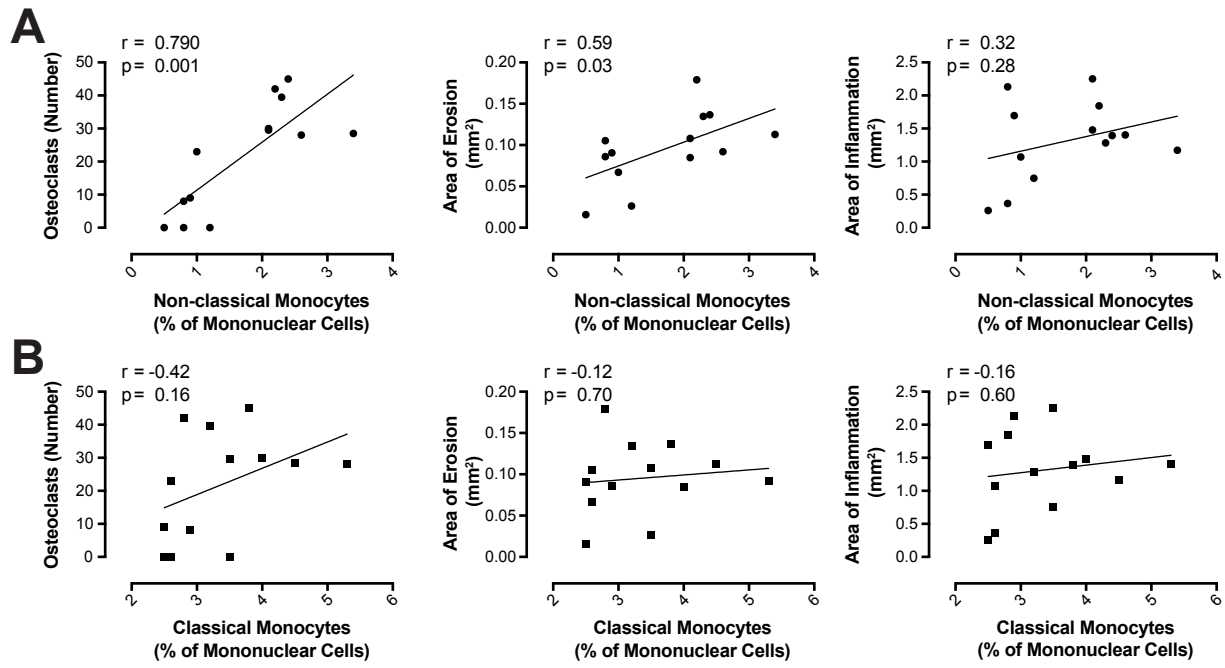

**C**

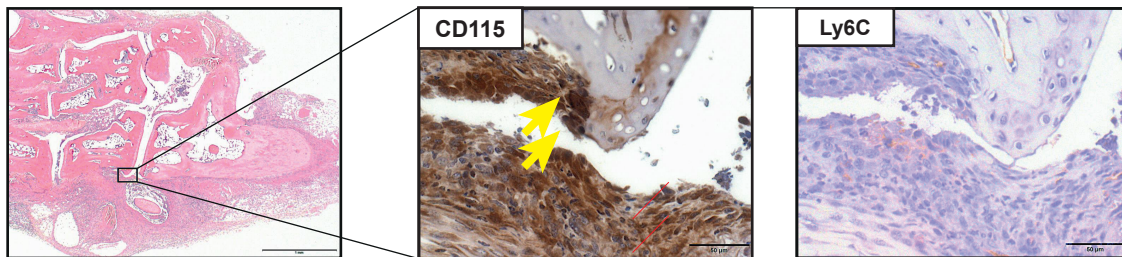

# Supplemental Figure 4

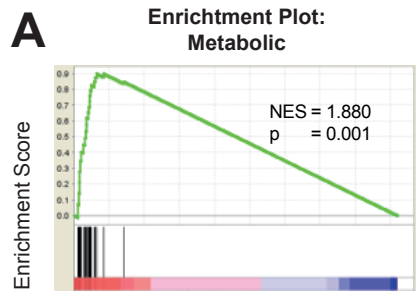

Up in Non-classical Monocytes

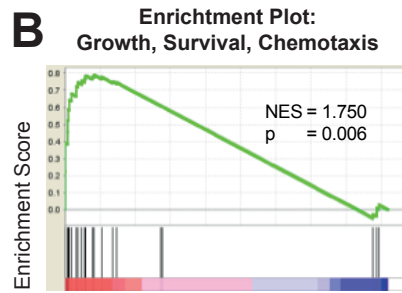

Up in Non-classical Monocytes

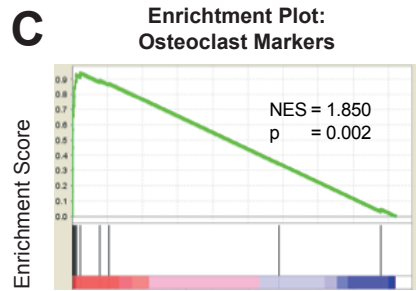

Up in Non-classical Monocytes

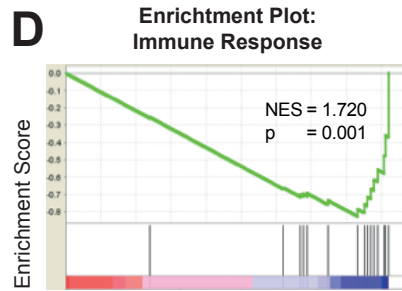

Up in Non-classical Monocytes



# Supplemental Figure 5

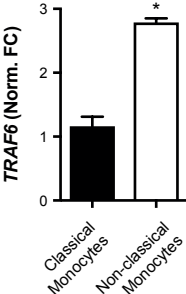

Supplement: annrheumdis-2018-213250supp001.pdf [file annrheumdis-2018-213250supp001.pdf]
